# Supplementary material for: High bandwidth linear viscoelastic properties of complex fluids from the measurement of their free surface fluctuations
Source: Royal Society of Chemistry journal article supplement (doi:10.1039/c1sm05258f), 2011-01-01
Supplement: c1sm05258f.pdf [file c1sm05258f.pdf]

Supplementary information :

## Viscoelastic SFSR spectra

### 1 Introduction

The problem is to find approximations for the integral

$$S(\omega) = -\frac{C}{\omega} \int_0^\infty k^3 \operatorname{Im}(\chi(\omega; k)) e^{-\frac{k^2 R^2}{c}} dk \quad (1)$$

where

$$\frac{1}{\chi(\omega; k)} = \sigma k^2 + \frac{G^2 k^3}{\omega^2 \rho} \left[ 4\sqrt{1 - \frac{\omega^2 \rho}{k^2 G}} - \left( 2 - \frac{\omega^2 \rho}{k^2 G} \right)^2 \right] \quad (2)$$

$C$  is a constant for the experiment and the notations  $G = G' + iG'' = |G| \exp(i\delta)$  are used. It is convenient to introduce the reduced variables

$$\omega^* = c^{3/4} \sqrt{\frac{\sigma}{\rho R^3}} \quad (3)$$

$$|G|^* = c^{1/2} \frac{\sigma}{R} \quad (4)$$

$$\Omega = \frac{\omega}{\omega^*} \quad (5)$$

$$\Gamma = \frac{|G|}{|G|^*} \quad (6)$$

and to analyse the behavior of the integral (1) in the plane,  $(\Omega, \Gamma)$  as these parameters vary easily over orders of magnitude while the surface tension  $\sigma$  does not vary much.

As intermediate parameters, one define

$$\varepsilon = \frac{\Omega}{\Gamma^{1/2}} \quad (7)$$

$$\beta = \frac{\Gamma^{3/2}}{\Omega} \quad (8)$$

Then

$$S(\omega) = -C \frac{\omega \rho R^2}{\sigma |G|} \operatorname{Im} \int_0^\infty \frac{x e^{-\varepsilon^2 x^2}}{1 + \beta \psi(x)} dx \quad (9)$$

where

$$\psi(x) = x e^{2i\delta} \left[ 4\sqrt{1 - \frac{e^{-i\delta}}{x^2}} - \left( 2 - \frac{e^{-i\delta}}{x^2} \right)^2 \right] \quad (10)$$

## 2 Discussion

The problem is to find approximations of

$$J = \int_0^\infty \frac{x e^{-\varepsilon^2 x^2}}{1 + \beta \psi(x)} dx \quad (11)$$

for different values of the parameters  $\varepsilon$  and  $\beta$ . As the imaginary part of  $J$  is sought, the leading non purely integer contribution to  $J$  is noted  $J'$  (more generally the prime symbol is used in the following to express the leading non purely integer term). One may notice the asymptotic behaviors :

$$\psi(x) \simeq -x^{-3} + 4e^{i\delta}x^{-1} + O(x^0) \text{ for } x \rightarrow 0 \quad (12)$$

$$\simeq 2e^{i\delta}x^{-1} + O(x^{-3}) \text{ for } x \rightarrow \infty \quad (13)$$

(in these developments, the first non-real term is kept).

The rigorous uniform asymptotics analysis of equ. (11) with respect to both parameters  $\varepsilon$  and  $\beta$  is rather cumbersome. The description given below is based on the following remark : except in a very narrow region near  $x = 1$ , one can approximate the function  $\psi(x)$  by the above asymptotic behavior (14) and (15), respectively for  $x < 1$  and  $x > 1$  :

$$\psi(x) \simeq -x^{-3} + 4e^{i\delta}x^{-1} \text{ for } x < 1 \quad (14)$$

$$\simeq 2e^{i\delta}x^{-1} \text{ for } x > 1 \quad (15)$$

Hence, to evaluate the quantity  $1 + \beta\psi(x)$ , it is convenient to define  $x^*$  as the solution<sup>1</sup> of  $|\psi(x^*)| = \beta^{-1}$ . For  $\beta \ll 1$ , one find  $x^* \simeq \beta^{1/3}$  and for  $\beta \gg 1$ ,  $x^* \simeq 2\beta$ . In both cases,

$$\beta |\psi(x)| \ll 1 \text{ for } x \gg x^* \quad (16)$$

$$\beta |\psi(x)| \gg 1 \text{ for } x \ll x^* \quad (17)$$

Moreover, the Gaussian factor imposes the practical integration region in equ. (11) : only the points  $0 < x < \varepsilon^{-1}$  contributes to the integral. Then, one can discuss several situations according to the values of the parameters.

### 2.1 $\varepsilon \gg 1$ or $\Gamma \ll \Omega^2$

In the case  $\varepsilon \gg 1$ , the development (14) is relevant to represent  $\psi$  as the contributions arising from  $x > 1$  are negligible. Then  $x^* \simeq \beta^{1/3}$ . It remains to compare both scales  $\beta^{1/3}$  and  $\varepsilon^{-1}$

---

1. When the sample is rather elastic, other solutions may exist near  $x = 1$ . They correspond to the Rayleigh elastic waves. They are not expected to give important contribution to the spectrum.

### 2.1.1 $\beta\epsilon^3 \gg 1$ or $\Omega > 1$

Here,  $x^* \gg \epsilon^{-1}$ , then the term 1 is everywhere negligible as compared to  $\beta\psi(x)$ . Then, the integral for  $J$  can be simplified :

$$J \simeq -\frac{1}{\beta} \int_0^\infty \frac{x^4 e^{-\epsilon^2 x^2}}{1 - 4x^2 e^{i\delta}} dx \quad (18)$$

$$\simeq -\frac{1}{\beta} \int_0^\infty x^4 (1 + 4x^2 e^{i\delta}) e^{-\epsilon^2 x^2} dx \quad (19)$$

and thus the leading non real term is

$$J' \simeq -\frac{15\sqrt{\pi}}{4} e^{i\delta} \epsilon^{-7} \beta^{-1} \quad (20)$$

### 2.1.2 $\beta\epsilon^3 \ll 1$ or $\Omega < 1$

Here, the complete denominator term has to be used

$$J \simeq \frac{1}{\beta} \int_0^\infty \frac{x^4 e^{-\epsilon^2 x^2}}{\frac{x^3}{\beta} - 1 + 4x^2 e^{i\delta}} dx \quad (21)$$

$$\simeq \frac{\beta^{2/3}}{3} \int_0^\infty \frac{v^{2/3} \exp(-\epsilon^2 \beta^{2/3} v^{2/3})}{v - 1 + 4\beta^{2/3} e^{i\delta} v^{2/3}} dv \quad (22)$$

As in this region  $\beta \ll 1$ , a pole at  $v \simeq 1$  exists just below the integration path. It gives rise to the leading non-real contribution to the integral :

$$J' \simeq \frac{i\pi}{3} \beta^{2/3} \exp(-\epsilon^2 \beta^{2/3}) \quad (23)$$

$$\simeq \frac{i\pi}{3} \beta^{2/3} \quad (24)$$

## 2.2 $\epsilon \ll 1$ or $\Gamma \gg \Omega^2$

A decomposition of the integral (11) can be written as :

$$J = \int_0^1 \frac{x dx}{1 + \beta(-x^{-3} + 4e^{i\delta} x^{-1})} + \int_1^\infty \frac{x e^{-\epsilon^2 x^2} dx}{1 + 2\beta e^{i\delta} x^{-1}} \quad (25)$$

$$= J_- + J_+ \quad (26)$$

(the Gaussian term is dropped in the first integral as it is nearly equal to 1). To simplify further the problem, one may compare  $x^*$  and 1 :

### 2.2.1 $\beta \ll 1$ or $\Gamma \ll \Omega^{2/3}$

When  $\beta \ll 1$ , one have  $0 < x^* < 1$  and the calculation of the first integral is similar to equ. (21),

$$J'_- \simeq \frac{i\pi}{3}\beta^{2/3} \quad (27)$$

In the second integral,  $2\beta x^{-1} \ll 1$ ,

$$J_+ \simeq \int_1^\infty x (1 - 2\beta e^{i\delta} x^{-1}) e^{-\varepsilon^2 x^2} dx \quad (28)$$

and thus

$$J'_+ \simeq -2\beta e^{i\delta} \int_1^\infty e^{-\varepsilon^2 x^2} dx \quad (29)$$

$$\simeq -\sqrt{\pi}\beta\varepsilon^{-1}e^{i\delta} \quad (30)$$

Finally,

$$J' \simeq \frac{i\pi}{3}\beta^{2/3} - \sqrt{\pi}\beta\varepsilon^{-1}e^{i\delta} \quad (31)$$

Amplitude of both terms is similar when  $\beta \simeq \varepsilon^3$ , i.e. when  $\Gamma = \Omega^{4/3}$ , then

$$J' \simeq \frac{i\pi}{3}\beta^{2/3} \text{ for } \Gamma < \Omega^{4/3} \quad (32)$$

$$\simeq -\sqrt{\pi}\beta\varepsilon^{-1}e^{i\delta} \text{ for } \Gamma > \Omega^{4/3} \quad (33)$$

### 2.2.2 $\beta \gg 1$ or $\Gamma \gg \Omega^{2/3}$

Here,  $x^* = 2\beta \gg 1$ . To evaluate  $J_-$ , one can consider that the term 1 in the denominator is negligible, just as in eq. (18) :

$$J_- \simeq -\frac{1}{\beta} \int_0^1 \frac{x^4}{1 - 4x^2 e^{i\delta}} dx \quad (34)$$

and thus

$$J_- = O(\beta^{-1}) \quad (35)$$

After splitting  $J_+$  into two terms

$$J_+ = \int_1^{x^*} \frac{x e^{-\varepsilon^2 x^2} dx}{1 + 2\beta e^{i\delta} x^{-1}} + \int_{x^*}^\infty \frac{x e^{-\varepsilon^2 x^2} dx}{1 + 2\beta e^{i\delta} x^{-1}} \quad (36)$$

a simplification of the integrals takes place when leading terms are kept :

$$J_+ \simeq \frac{e^{-i\delta}}{2\beta} \int_1^{2\beta} x^2 e^{-\varepsilon^2 x^2} dx + \int_{2\beta}^{\infty} x (1 - 2\beta e^{i\delta} x^{-1}) e^{-\varepsilon^2 x^2} dx \quad (37)$$

$$J'_+ \simeq 4\beta^2 \left[ e^{-i\delta} \int_0^1 t^2 e^{-z^2 t^2} dt - e^{i\delta} \int_1^{\infty} e^{-z^2 t^2} dt \right] \quad (38)$$

$$(39)$$

where  $z = 2\beta\varepsilon = 2\Gamma$  and the lower limit for the first integral has been extended down to 0 without changing appreciably its value. Now, two situations are to be discussed :

- For  $\Gamma \gg 1$  the first integral dominates. Watson lemma leads to the result

$$J'_+ \simeq \frac{\sqrt{\pi} e^{-i\delta}}{8\beta\varepsilon^3} \quad (40)$$

- For  $\Gamma \ll 1$  the second integral dominates and gives

$$J'_+ \simeq -\frac{\sqrt{\pi}\beta e^{i\delta}}{\varepsilon} \quad (41)$$

In both cases the  $J_-$  contribution is negligible, thus

$$J' \simeq \frac{\sqrt{\pi} e^{-i\delta}}{8\beta\varepsilon^3} \text{ for } \Gamma \gg 1 \quad (42)$$

$$\simeq -\frac{\sqrt{\pi}\beta e^{i\delta}}{\varepsilon} \text{ for } \Gamma \ll 1 \quad (43)$$

### 3 Results

Results obtained for the different regions can be collected in the plane  $(\Omega, \Gamma)$ . The figure below gives a summary of the results in this plane.

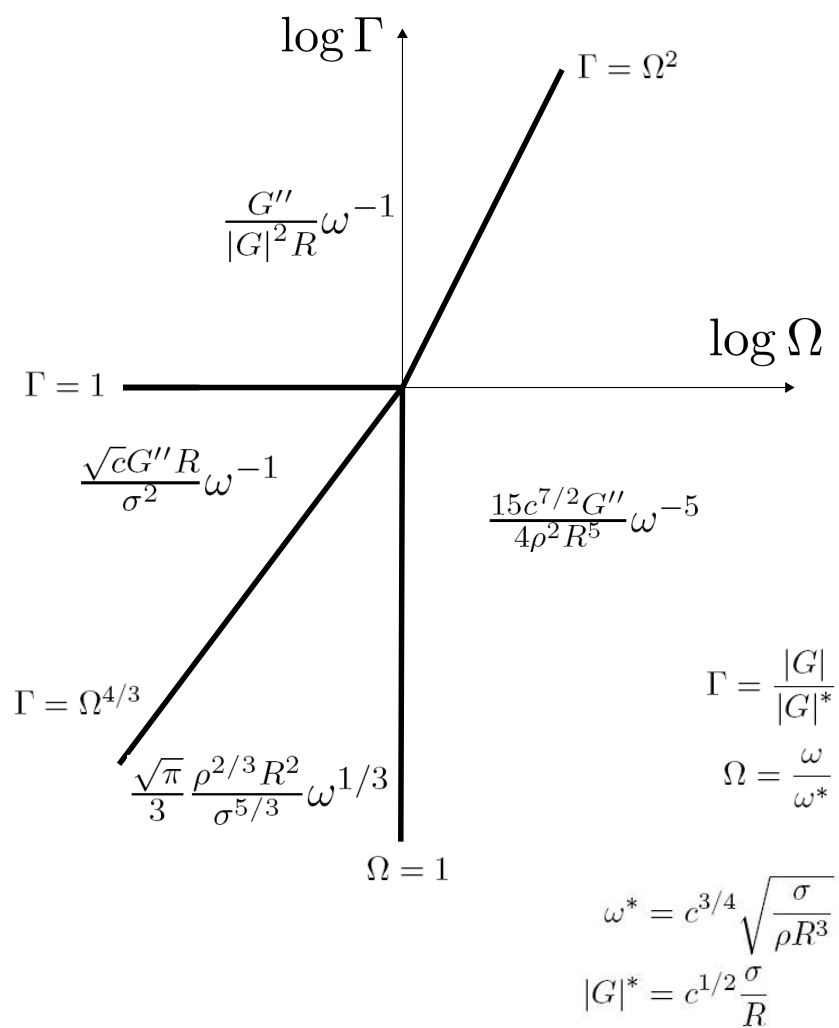

FIGURE 1 – Asymptotic behaviors for the SFSR spectrum in the plane  $(\log \Gamma, \log \Omega)$ .
